# Supplementary material for: A type I Bi2S3@ZnS core–shell structured photocatalyst for the selective photoelectrochemical sensing of Cu2+
Source: Royal Society of Chemistry journal article supplement (doi:10.1039/c9ay00591a), 2019-01-01
Supplement: c9ay00591a1.pdf [file c9ay00591a1.pdf]

## Supporting Information

### **Type I Bi<sub>2</sub>S<sub>3</sub>@ZnS Core-shell Structured Photocatalyst for the Selective Photoelectrochemical Sensing of Cu<sup>2+</sup>**

Jiajia Xi, Hao Wang, Bihong Zhang, Xiaopeng Hu, Faqiong Zhao and Baizhao Zeng\*

Key Laboratory of Analytical Chemistry for Biology and Medicine (Ministry of Education), College of Chemistry and Molecular Sciences, Wuhan University, Wuhan 430072, Hubei Province, P. R. China

Corresponding Author:

\* Tel: 86-27-68752701; Fax: 86-27-68754067;

\*E-mail address: bzzeng@whu.edu.cn

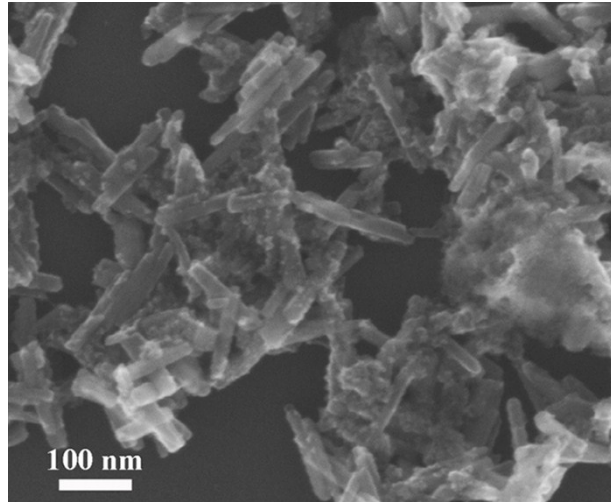

Fig. S1. SEM image of Bi<sub>2</sub>S<sub>3</sub>@ZnS prepared without CA.

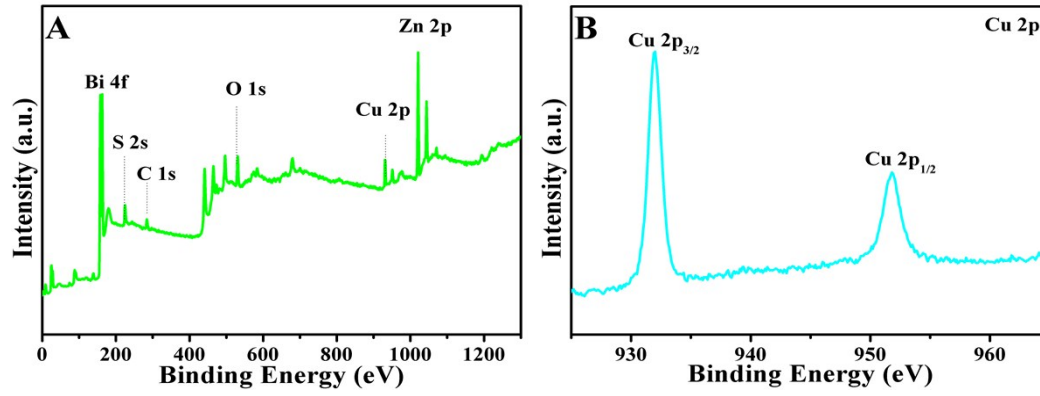

Fig. S2. XPS spectrum (A) of  $\text{Bi}_2\text{S}_3@\text{ZnS}$  composite after added  $\text{Cu}^{2+}$  to the solution. High-resolution XPS spectrum (B) of Cu 2p in  $\text{Bi}_2\text{S}_3@\text{ZnS}$  composite after added  $\text{Cu}^{2+}$  to the solution.

Table S1. EDX data of Bi<sub>2</sub>S<sub>3</sub>@ZnS composite.

| Element | Wt%   | At%   |
|---------|-------|-------|
| S K     | 18.32 | 53.15 |
| Zn K    | 10.73 | 15.27 |
| Bi M    | 70.95 | 31.58 |

Table S2. Pearson absolute electronegativity (PAE) of constituent atoms of the photocatalyst Bi<sub>2</sub>S<sub>3</sub>@ZnS.

|          | Bi   | S    | Zn   |
|----------|------|------|------|
| PAE (eV) | 4.69 | 6.22 | 4.45 |

Table S3 Energy band structure parameters of Bi<sub>2</sub>S<sub>3</sub> and ZnS photocatalysts.

| Semiconductors                 | Electronegativity<br>( <i>X</i> ) | Estimated<br><i>E<sub>g</sub></i> (eV) | Calculated<br><i>E<sub>CB</sub></i> (eV) | Calculated<br><i>E<sub>VB</sub></i> (eV) |
|--------------------------------|-----------------------------------|----------------------------------------|------------------------------------------|------------------------------------------|
| Bi <sub>2</sub> S <sub>3</sub> | 5.56                              | 1.38                                   | 0.37                                     | 1.75                                     |
| ZnS                            | 5.26                              | 3.44                                   | -0.96                                    | 2.48                                     |

Table S4. Comparison of various PEC sensors for Cu<sup>2+</sup> detection.

| PEC sensors                         | Linear range (μM) | LOD (μM) | Ref.           |
|-------------------------------------|-------------------|----------|----------------|
| SnO <sub>2</sub> /CdS               | 1.0-38.0          | 0.55     | s <sup>1</sup> |
| CdS Nps-Au QDs                      | 0.0005-0.12       | 0.00673  | s <sup>2</sup> |
| CdZnS                               | 0.01-100          | 0.003    | s <sup>3</sup> |
| Au/ZnS Nps                          | 0.001 – 1.0       | 0.0005   | s <sup>4</sup> |
| CdxZn <sub>1-x</sub> S-rGO          | 0.02-20           | 0.067    | s <sup>5</sup> |
| Bi <sub>2</sub> S <sub>3</sub> @ZnS | 0.003-30          | 0.001    | This work      |

## References

- 1 F. Huang, F. Pu, X. Lu, H. Zhang, Y. Xia, W. Huang and Z. Li, *Sensors and Actuators B-Chemical*, 2013, **183**, 601-607.
- 2 I. Ibrahim, H. N. Lim, O. K. Abou-Zied, N. M. Huang, P. Estrela and A. Pandikumar, *Journal of Physical Chemistry C*, 2016, **120**, 22202-22214.
- 3 Y. Zhang, H. Ma, D. Wu, R. Li, X. Wang, Y. Wang, W. Zhu, Q. Wei and B. Du, *Biosensors & Bioelectronics*, 2016, **77**, 936-941.
- 4 H. Xu, D. Huang, Y. Wu and J. Di, *Sensors and Actuators B-Chemical*, 2016, **235**, 432-438.
- 5 J. Yan, K. Wang, Q. Liu, J. Qian, X. Dong, W. Liu and B. Qiu, *RSC Advances*, 2013, **3**, 14451-14457.
